# Supplementary material for: The nature of the interface and the diffusion coefficient of HCl/ice and HBr/ice in the temperature range 190–205 K
Source: Royal Society of Chemistry journal article supplement (doi:10.1039/b308422c), 2003-01-01
Supplement: b306620g.pdf [file b306620g.pdf]

**Table S1:** Cl<sub>2</sub>-yield  $\eta_{\text{Cl}_2}$  observed from dope and probe experiments on (C), (B), (SC) and (C★) (see Appendix I) ice as a function of the time delay between HCl doping and ClONO<sub>2</sub> ( $F^{\text{in}} \approx 1 \cdot 10^{15}$  molecule/s) probing. The symbols are explained in the text.

| N(HCl) <sup>(a)</sup><br>[molecules] | Cl <sub>2</sub> (g) <sup>(b)</sup><br>[molecules] | Delay<br>[s] | $\eta_{\text{Cl}_2}$<br>[%] | $t_{\text{MB}}$<br>[s] | I<br>[nm] | H<br>[nm] | h<br>[nm] |
|--------------------------------------|---------------------------------------------------|--------------|-----------------------------|------------------------|-----------|-----------|-----------|
| <b>(C) 190 K</b>                     |                                                   |              |                             |                        |           |           |           |
| $3.8 \cdot 10^{16}$                  | $2.0 \cdot 10^{16}$                               | 240          | 84                          | 12                     | 67        | 810       | 319       |
| $1.6 \cdot 10^{16}$                  | $1.2 \cdot 10^{16}$                               | 270          | 77                          | 10                     | 73        | 2525      | 1350      |
| $3.8 \cdot 10^{16}$                  | $2.9 \cdot 10^{16}$                               | 300          | 76                          | 8                      | 55        | 820       | 350       |
| <b>(C) 200 K</b>                     |                                                   |              |                             |                        |           |           |           |
| $1.8 \cdot 10^{16}$                  | $1.4 \cdot 10^{16}$                               | 138          | 78                          | 6                      | 58        | 221       | 125       |
| $1.9 \cdot 10^{16}$                  | $1.5 \cdot 10^{16}$                               | 210          | 81                          | 8                      | 37        | 300       | 161       |
| $1.7 \cdot 10^{16}$                  | $1.2 \cdot 10^{16}$                               | 270          | 71                          | 5                      | 33        | 213       | 126       |
| $2.7 \cdot 10^{16}$                  | $2.0 \cdot 10^{16}$                               | 270          | 74                          | 13                     | 125       | 7500      | 3775      |
| $1.8 \cdot 10^{16}$                  | $8.5 \cdot 10^{15}$                               | 390          | 48                          | 8                      | 32        | 302       | 177       |
| $2.0 \cdot 10^{16}$                  | $7.0 \cdot 10^{15}$                               | 600          | 35                          | 7                      | 100       | 7425      | 3725      |
| $1.8 \cdot 10^{16}$                  | $6.9 \cdot 10^{15}$                               | 690          | 38                          | 6                      | 55        | 212       | 113       |
| $1.8 \cdot 10^{16}$                  | $4.0 \cdot 10^{15}$                               | 1062         | 22                          | 5                      | 15        | 303       | 163       |
| $1.6 \cdot 10^{16}$                  | $3.0 \cdot 10^{15}$                               | 1710         | 19                          | 5                      | 50        | 207       | 117       |
| <b>(B) 140 K</b>                     |                                                   |              |                             |                        |           |           |           |
| $5.2 \cdot 10^{16}$                  | $3.1 \cdot 10^{16}$                               | 240          | 60                          | 12                     | 15        |           |           |
| $5.1 \cdot 10^{16}$                  | –                                                 | 240          | –                           | 18                     | 20        |           |           |
| <b>(B) 190 K</b>                     |                                                   |              |                             |                        |           |           |           |
| $1.6 \cdot 10^{16}$                  | $1.5 \cdot 10^{16}$                               | 90           | 94                          | 12                     | 76        |           |           |
| $2.4 \cdot 10^{16}$                  | $2.0 \cdot 10^{16}$                               | 180          | 83                          | 20                     | 124       |           |           |
| $2.0 \cdot 10^{16}$                  | $1.1 \cdot 10^{16}$                               | 300          | 54                          | 16                     | 100       |           |           |
| $2.6 \cdot 10^{16}$                  | $1.1 \cdot 10^{16}$                               | 300          | 42                          | 11                     | 70        |           |           |
| $3.3 \cdot 10^{16}$                  | $1.3 \cdot 10^{16}$                               | 840          | 38                          | 18                     | 112       |           |           |
| $2.6 \cdot 10^{16}$                  | $7.8 \cdot 10^{15}$                               | 900          | 31                          | 12                     | 76        |           |           |
| $2.2 \cdot 10^{16}$                  | $4.2 \cdot 10^{15}$                               | 1800         | 19                          | 7                      | 46        |           |           |
| <b>(B) 200 K</b>                     |                                                   |              |                             |                        |           |           |           |
| $4.9 \cdot 10^{16}$                  | $3.8 \cdot 10^{16}$                               | 150          | 77                          | 25                     | 219       |           |           |
| $4.1 \cdot 10^{16}$                  | $3.0 \cdot 10^{16}$                               | 190          | 74                          | 18                     | 156       |           |           |
| $6.2 \cdot 10^{16}$                  | $3.5 \cdot 10^{16}$                               | 760          | 57                          | 29                     | 255       |           |           |
| <b>(SC) 190 K</b>                    |                                                   |              |                             |                        |           |           |           |

*continued*

| N(HCl) <sup>(a)</sup><br>[molecules] | Cl <sub>2</sub> (g) <sup>(b)</sup><br>[molecules] | Delay<br>[s] | $\eta_{\text{Cl}_2}$<br>[%] | $t_{\text{MB}}$<br>[s] | I<br>[nm] | H<br>[nm] | h<br>[nm] |
|--------------------------------------|---------------------------------------------------|--------------|-----------------------------|------------------------|-----------|-----------|-----------|
| $1.6 \cdot 10^{16}$                  | $1.5 \cdot 10^{16}$                               | 180          | 95                          | 12                     | 94        |           |           |
| <b>(SC) 200 K</b>                    |                                                   |              |                             |                        |           |           |           |
| $2.1 \cdot 10^{16}$                  | $2.0 \cdot 10^{16}$                               | 100          | 97                          | 10                     | 82        |           |           |
| $1.9 \cdot 10^{16}$                  | $1.7 \cdot 10^{16}$                               | 180          | 92                          | 8                      | 66        |           |           |
| $2.7 \cdot 10^{16}$                  | $2.3 \cdot 10^{16}$                               | 220          | 83                          | 10                     | 88        |           |           |
| $2.1 \cdot 10^{16}$                  | $1.7 \cdot 10^{16}$                               | 400          | 81                          | 12                     | 106       |           |           |
| $2.7 \cdot 10^{16}$                  | $2.1 \cdot 10^{16}$                               | 610          | 79                          | 6                      | 50        |           |           |
| <b>(C★) 190 K</b>                    |                                                   |              |                             |                        |           |           |           |
| $1.3 \cdot 10^{17}$                  | $2.1 \cdot 10^{16}$                               | –            | 16                          | 12                     | 76        | 1830      | 750       |
| <b>(C★) 200 K</b>                    |                                                   |              |                             |                        |           |           |           |
| $5.0 \cdot 10^{16}$                  | $1.5 \cdot 10^{16}$                               | –            | 30                          | 8                      | 49        | 1930      | 851       |

<sup>(a)</sup> N(HCl) is the total number of HCl molecules adsorbed on the ice sample. <sup>(b)</sup> Cl<sub>2</sub>(g) is the number of Cl<sub>2</sub> molecules released during the "main burst"  $t_{\text{MB}}$ .

**Table S2:** Br<sub>2</sub>-yield  $\eta_{\text{Br}_2}$  observed from dope and probe experiments on (C), (B), (S) (Appendix II), (SC) and (C<sup>★</sup>) (see Appendix I) ice as a function of the time delay between HBr doping and BrONO<sub>2</sub> ( $F^{\text{in}} \approx 1.5 \cdot 10^{15}$  molecule/s) probing. The symbols are explained in the text.

| N(HBr) <sup>(a)</sup><br>[molecules] | Br <sub>2</sub> (g) <sup>(b)</sup><br>[molecules] | Delay<br>[s] | $\eta_{\text{Br}_2}$<br>[%] | $t_{\text{MB}}$<br>[s] | I<br>[nm] | H<br>[nm] | h<br>[nm] |
|--------------------------------------|---------------------------------------------------|--------------|-----------------------------|------------------------|-----------|-----------|-----------|
| <b>(C) 190 K</b>                     |                                                   |              |                             |                        |           |           |           |
| $9.5 \cdot 10^{16}$                  | $3.6 \cdot 10^{16}$                               | 210          | 38                          | 47                     | 31        | 2820      | 1624      |
| $1.1 \cdot 10^{17}$                  | $3.1 \cdot 10^{16}$                               | 390          | 28                          | 43                     | 30        | 3290      | 1047      |
| $1.2 \cdot 10^{17}$                  | $2.1 \cdot 10^{16}$                               | 610          | 18                          | 31                     | 15        | 1670      | 941       |
| $1.1 \cdot 10^{17}$                  | $2.6 \cdot 10^{16}$                               | 750          | 24                          | 28                     | 30        | 1980      | 1788      |
| <b>(C) 205 K</b>                     |                                                   |              |                             |                        |           |           |           |
| $5.6 \cdot 10^{16}$                  | $1.4 \cdot 10^{16}$                               | 130          | 25                          | 21                     | 65        | 633       | 327       |
| $5.5 \cdot 10^{16}$                  | $1.4 \cdot 10^{16}$                               | 240          | 25                          | 34                     | 66        | 678       | 347       |
| $5.4 \cdot 10^{16}$                  | $1.5 \cdot 10^{16}$                               | 270          | 28                          | 20                     | 39        | 452       | 238       |
| $5.7 \cdot 10^{16}$                  | $1.2 \cdot 10^{16}$                               | 420          | 21                          | 32                     | 55        | 673       | 344       |
| $5.4 \cdot 10^{16}$                  | $9.7 \cdot 10^{15}$                               | 540          | 18                          | 22                     | 35        | 440       | 236       |
| $5.2 \cdot 10^{16}$                  | $1.0 \cdot 10^{16}$                               | 690          | 21                          | 24                     | 73        | 656       | 339       |
| $5.2 \cdot 10^{16}$                  | $7.5 \cdot 10^{15}$                               | 930          | 15                          | 25                     | 33        | 483       | 250       |
| $5.2 \cdot 10^{16}$                  | $9.1 \cdot 10^{15}$                               | 1050         | 18                          | 29                     | 80        | 690       | 368       |
| $5.7 \cdot 10^{16}$                  | $4.8 \cdot 10^{15}$                               | 1350         | 9                           | 11                     | 20        | 409       | 229       |
| $7.8 \cdot 10^{16}$ <sup>(c)</sup>   | $2.0 \cdot 10^{16}$                               | 390          | 26                          | 6.7                    |           | 870       | 870       |
| $3.2 \cdot 10^{16}$ <sup>(c)</sup>   | $5.9 \cdot 10^{15}$                               | 270          | 19                          | 2.4                    |           | 930       | 930       |
| <b>(B) 190 K</b>                     |                                                   |              |                             |                        |           |           |           |
| $8.8 \cdot 10^{16}$                  | $4.6 \cdot 10^{16}$                               | 180          | 52                          | 34                     | 22        |           |           |
| $9.3 \cdot 10^{16}$                  | $4.0 \cdot 10^{16}$                               | 240          | 42                          | 25                     | 17        |           |           |
| $1.1 \cdot 10^{17}$                  | $4.2 \cdot 10^{16}$                               | 390          | 40                          | 49                     | 31        |           |           |
| $9.1 \cdot 10^{16}$                  | $2.7 \cdot 10^{16}$                               | 930          | 30                          | 29                     | 19        |           |           |
| <b>(S) 205 K<sup>(d)</sup></b>       |                                                   |              |                             |                        |           |           |           |
| $6.7 \cdot 10^{16}$                  | $1.6 \cdot 10^{16}$                               | 270          | 24                          | 41                     | 59        | 808       | 421       |
| $5.5 \cdot 10^{16}$                  | $9.0 \cdot 10^{15}$                               | 520          | 16                          | 22                     | 80        | 864       | 444       |
| $1.1 \cdot 10^{17}$                  | $9.2 \cdot 10^{15}$                               | 900          | 8                           | 42                     | 38        | 753       | 395       |
| <b>(SC) 190 K</b>                    |                                                   |              |                             |                        |           |           |           |
| $9.0 \cdot 10^{16}$                  | $3.5 \cdot 10^{16}$                               | 280          | 38                          | 29                     | 19        |           |           |
| $9.1 \cdot 10^{16}$                  | $3.1 \cdot 10^{16}$                               | 460          | 34                          | 27                     | 18        |           |           |

*continued*

| $N(\text{HBr})$ <sup>(a)</sup> | $\text{Br}_2(\text{g})$ <sup>(b)</sup> | Delay | $\eta_{\text{Br}_2}$ | $t_{\text{MB}}$ | I    | H    | h    |
|--------------------------------|----------------------------------------|-------|----------------------|-----------------|------|------|------|
| [molecules]                    | [molecules]                            | [s]   | [%]                  | [s]             | [nm] | [nm] | [nm] |
| $9.2 \cdot 10^{16}$            | $2.8 \cdot 10^{16}$                    | 640   | 30                   | 20              | 14   |      |      |
| <b>(C★) 205 K</b>              |                                        |       |                      |                 |      |      |      |
| $3.4 \cdot 10^{17}$            | $4.6 \cdot 10^{16}$                    | –     | 14                   | 26              | 54   | 824  |      |
| $4.0 \cdot 10^{17}$            | $1.4 \cdot 10^{17}$                    | –     | 35                   | 40              | 82   | 729  |      |

- <sup>(a)</sup>  $N(\text{HBr})$  is the total number of HBr molecules adsorbed on the ice sample.
- <sup>(b)</sup>  $\text{Br}_2(\text{g})$  is the number of  $\text{Br}_2$  molecules released during the "main burst"  $t_{\text{MB}}$ .
- <sup>(c)</sup> DPE performed with an external  $\text{H}_2\text{O}$  flow.
- <sup>(d)</sup> (S) = Sandwich ice, see Appendix V.
